# Supplementary material for: A new 30 000-year chronology for rapidly deposited sediments on the Lomonosov Ridge using bulk radiocarbon dating and probabilistic stratigraphic alignment
Source: Copernicus journal article supplement (doi:10.5194/gchron-2-81-2020), 2020-04-22
Supplement: Supplementary file 1 [file gchron-2-81-2020-supplement.zip]

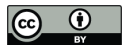

## *Supplement of*

# **A new 30 000-year chronology for rapidly deposited sediments on the Lomonosov Ridge using bulk radiocarbon dating and probabilistic stratigraphic alignment**

**Francesco Muschitiello et al.**

*Correspondence to:* Francesco Muschitiello ([francesco.muschitiello@geog.cam.ac.uk](mailto:francesco.muschitiello@geog.cam.ac.uk))

- [gchron-2-81-2020-supplement-title-page.pdf](#)
- [Supplementary Data 1.xlsx](#)
- [Supplementary Data 2.xlsx](#)
- [\\_\\_MACOSX](#)
  - [.\\_Supplementary Data 1.xlsx](#)
  - [.\\_Supplementary Data 2.xlsx](#)

The copyright of individual parts of the supplement might differ from the CC BY 4.0 License.
